# Supplementary material for: The Clinical Impact of Flow Titration on Epoprostenol Delivery via High Flow Nasal Cannula for ICU Patients with Pulmonary Hypertension or Right Ventricular Dysfunction: A Retrospective Cohort Comparison Study
Source: PubMed Central journal article supplement (PMC7074129; doi:10.3390/jcm9020464), 2020-02-07
Supplement: jcm-09-00464-s001.pdf [file jcm-09-00464-s001.pdf]

**Supplemental Table S1.** Non-ECMO patients' outcome.

|                                | Overall           | Flow titration   | Constant flow      | <i>p</i> |
|--------------------------------|-------------------|------------------|--------------------|----------|
| No. of patients                | 47                | 24               | 23                 |          |
| iEPO duration, hours           | 64.5 (34.8,104.6) | 59.8 (36, 104.5) | 68.4 (21.6, 104.6) | 0.873    |
| Intubation (%)                 | 6 (12.8%)         | 2 (8.3%)         | 4 (17.4%)          | 0.416    |
| ICU alive (%)                  | 37 (78.7%)        | 20 (83.3%)       | 17 (73.9%)         | 0.494    |
| ICU length of stay, days       | 10 (6, 15)        | 9.5 (6, 14)      | 11 (6, 17)         | 0.257    |
| Hospital alive (%)             | 34 (72.3%)        | 18 (75%)         | 16 (69.6%)         | 0.752    |
| Hospital length of stay (days) | 12 (7, 17)        | 12 (6.5, 16.8)   | 12 (7,17)          | 0.915    |

iEPO, inhaled epoprostenol; ICU, intensive care unit; ECMO, extracorporeal membrane oxygenation.

**Supplemental Table S2.** Comparisons of demographic information and outcome with titrated flow vs constant flow for patients who had definite evaluation on responses.

|                                       | Overall          | Flow titration   | Constant flow      | <i>p</i> |
|---------------------------------------|------------------|------------------|--------------------|----------|
| No. of patients                       | 39               | 21               | 18                 |          |
| Age, years                            | 62.7 ± 17.5      | 63.4 ± 16.4      | 59.9 ± 20.1        | 0.555    |
| Gender (Male) (%)                     | 19 (48.7%)       | 12 (57.1%)       | 7 (38.9%)          | 0.341    |
| Race: African American (%)            | 18 (46.2%)       | 9 (42.9%)        | 9 (50%)            | 0.664    |
| SICU (%)                              | 21 (53.8%)       | 12 (57.1%)       | 9 (50%)            | 0.905    |
| MICU (%)                              | 8 (20.5%)        | 4 (19%)          | 4 (22.2%)          |          |
| Diagnosis (%)                         |                  |                  |                    | 0.033    |
| PH                                    | 11 (28.2%)       | 9 (42.9%)        | 2 (11.1%)          |          |
| PH + Hypoxemia                        | 14 (35.9%)       | 9 (42.9%)        | 5 (27.8%)          |          |
| PH + RVD                              | 1 (2.6%)         | 0                | 1 (5.6%)           |          |
| RVD                                   | 3 (7.7%)         | 0                | 3 (16.7%)          |          |
| RVD + Hypoxemia                       | 4 (10.3%)        | 2 (9.5%)         | 2 (11.1%)          |          |
| PH + RVD+ Hypoxemia                   | 6 (15.4%)        | 1 (4.8%)         | 5 (27.8%)          |          |
| iEPO indication (%)                   |                  |                  |                    |          |
| PH                                    | 32 (82.1%)       | 19 (90.5%)       | 13 (72.7%)         | 0.215    |
| RVD                                   | 14 (35.9%)       | 3 (14.3%)        | 11 (61.1%)         | 0.003    |
| Hypoxemia                             | 24 (61.5%)       | 12 (57.1%)       | 12 (66.7%)         | 0.742    |
| ECMO while iEPO was initiated (%)     | 3 (7.1%)         | 1 (4.8%)         | 2 (11.1%)          | 0.586    |
| Chronic pulmonary disease (%)         | 17 (43.6%)       | 10 (47.6%)       | 7 (38.9%)          | 0.748    |
| Home oxygen use (%)                   | 15 (38.5%)       | 6 (28.6%)        | 9 (50%)            | 0.134    |
| sPAP by Echo, mmHg <sup>b</sup>       | 63 (49, 82.5)    | 59.8 ± 22.3      | 80.8 ± 28.7        | 0.141    |
| mPAP, mmHg <sup>c</sup>               | 45.6 ± 6.6       | 44.6 ± 5.4       | 50.5 ± 12.2        | NA       |
| CO, L/min <sup>d</sup>                | 4.40 ± 2.14      | 4.42 ± .73       | 6.55 ± 3.04        | NA       |
| CI, L/min/m <sup>2</sup> <sup>d</sup> | 2.47 ± 1.01      | 2.14 ± .26       | 3.65 ± 2.06        | NA       |
| Responders (%)                        | 27 (69.2%)       | 18 (85.7%)       | 9 (50%)            | 0.035    |
| iEPO duration (hours)                 | 55 (30.7, 107.3) | 53.1 (37, 101.7) | 70.7 (20.2, 165.5) | 0.967    |
| Intubation (%)                        | 6 (15.4%)        | 2 (9.5%)         | 4 (22.2%)          | 0.387    |
| iEPO Complications (%)                | 10 (25.6%)       | 4 (19%)          | 6 (33.3%)          | 0.150    |
| Bleeding                              | 3 (7.7%)         | 0                | 3 (16.7%)          |          |
| Hemodynamic instability               | 7 (17.9%)        | 4 (19%)          | 3 (16.7%)          |          |
| ICU alive (%)                         | 31 (79.5%)       | 18 (85.7%)       | 13 (72.2%)         | 0.432    |
| ICU stay, days                        | 12 (8, 16)       | 10 (5.5, 14)     | 13.5 (9.5, 21.8)   | 0.047    |
| Non-ECMO patients <sup>e</sup>        |                  | 9 (5.3, 13.8)    | 12 (8.5, 18.5)     | 0.089    |
| Hospital alive (%)                    | 29 (74.4%)       | 17 (81%)         | 12 (66.7%)         | 0.465    |
| Hospital stay (days)                  | 13 (8, 20)       | 12 (7, 16.5)     | 14 (11, 23.3)      | 0.269    |

iEPO, inhaled epoprostenol; HFNC, high-flow nasal cannula; PH, pulmonary hypertension; RVD, right ventricular dysfunction; ECMO, extracorporeal membrane oxygenation; EF, ejection fraction; mPAP, mean pulmonary arterial pressure; sPAP, systolic pulmonary arterial pressure; CO, cardiac output; CI, cardiac index; ICU, intensive care unit. <sup>a</sup> data available in 17 and 12 patients, respectively; <sup>b</sup> data available in 16 and 9 patients, respectively; <sup>c</sup> data available in 9 and 2 patients, respectively; <sup>d</sup> data available in 7 and 2 patients, respectively; <sup>e</sup> data available in 20 and 16 patients, respectively.

**Supplemental Table 3.1** Comparison of hemodynamic responses pre and post iEPO for female patients.

|                          | No. of patients | Prior to iEPO | Post iEPO   | <i>p</i> |
|--------------------------|-----------------|---------------|-------------|----------|
| mPAP, mmHg               | 9               | 44.7 ± 8.5    | 38.8 ± 4.6  | 0.038    |
| Flow titration           | 4               | 46.5 ± 10.0   | 38.9 ± 4.3  | 0.144    |
| Constant flow            | 5               | 43.3 ± 8.0    | 38.7 ± 5.3  | 0.138    |
| CO, L/min                | 7               | 4.93 ± 2.01   | 5.53 ± 2.06 | 0.351    |
| Flow titration           | 3               | 5.53 ± 2.79   | 6.37 ± 1.76 | 0.593    |
| Constant flow            | 4               | 4.48 ± 1.49   | 4.90 ± 2.28 | 0.461    |
| CI, L/min/m <sup>2</sup> | 7               | 2.51 ± 0.91   | 2.89 ± 1.03 | 0.207    |
| Flow titration           | 3               | 2.43 ± 1.07   | 2.97 ± 0.64 | 0.285    |
| Constant flow            | 4               | 2.58 ± .93    | 2.83 ± 1.36 | 0.414    |

**Supplemental Table 3.2** Comparison of parameters and oxygenation responses pre and post iEPO for female patients.

|                                    | No. of patients | Prior to iEPO | Post iEPO    | <i>p</i> |
|------------------------------------|-----------------|---------------|--------------|----------|
| SpO <sub>2</sub> /FiO <sub>2</sub> | 15              | 128.6 ± 50.0  | 163.5 ± 73.7 | 0.003    |
| Flow titration                     | 7               | 145.14 ± 57.2 | 196.9 ± 85.1 | 0.028    |
| Constant flow                      | 8               | 114.0 ± 41.0  | 134.2 ± 50.5 | 0.069    |
| FiO <sub>2</sub>                   | 15              | 0.79 ± 0.22   | 0.68 ± 0.25  | 0.042    |
| Flow titration                     | 7               | 0.74 ± 0.24   | 0.59 ± 0.29  | 0.066    |
| Constant flow                      | 8               | 0.84 ± 0.20   | 0.77 ± 0.20  | 0.279    |
| SpO <sub>2</sub> , %               | 15              | 90.5 ± 8.1    | 95.4 ± 3.2   | 0.028    |
| Flow titration                     | 7               | 92.4 ± 4.0    | 96.0 ± 2.8   | 0.150    |
| Constant flow                      | 8               | 88.8 ± 10.4   | 94.9 ± 3.6   | 0.107    |

**Supplemental Table 3.3** Comparison of hemodynamic responses pre and post iEPO for male patients.

|                          | No. of patients | Prior to iEPO | Post iEPO   | <i>p</i> |
|--------------------------|-----------------|---------------|-------------|----------|
| mPAP, mmHg               | 12              | 42.7 ± 13.9   | 34.4 ± 12.1 | 0.002    |
| Flow titration           | 9               | 47.1 ± 13.3   | 37.1 ± 12.9 | 0.008    |
| Constant flow            | 3               | 29.5 ± 2.0    | 26.2 ± 1.0  | 0.102    |
| CO, L/min                | 7               | 5.31 ± 1.72   | 6.69 ± 2.35 | 0.063    |
| Flow titration           | 5               | 4.78 ± 1.20   | 6.66 ± 1.83 | 0.080    |
| Constant flow            | 2               | NA            | NA          | NA       |
| CI, L/min/m <sup>2</sup> | 8               | 2.76 ± 0.70   | 3.34 ± 0.95 | 0.035    |
| Flow titration           | 6               | 2.70 ± 0.70   | 3.45 ± 0.80 | 0.046    |
| Constant flow            | 2               | NA            | NA          | NA       |

**Supplemental Table 3.4** Comparison of parameters and oxygenation responses pre and post iEPO for male patients.

|                                    | No. of patients | Prior to iEPO | Post iEPO    | <i>p</i> |
|------------------------------------|-----------------|---------------|--------------|----------|
| SpO <sub>2</sub> /FiO <sub>2</sub> | 9               | 126.5 ± 40.3  | 147.9 ± 38.1 | 0.028    |
| Flow titration                     | 5               | 117.0 ± 45.9  | 141.1 ± 39.7 | 0.043    |
| Constant flow                      | 4               | 138.5 ± 34.2  | 156.4 ± 39.9 | 0.465    |
| FiO <sub>2</sub>                   | 9               | 0.79 ± 0.21   | .68 ± 0.19   | 0.063    |
| Flow titration                     | 5               | 0.86 ± 0.22   | 0.72 ± 0.19  | 0.102    |
| Constant flow                      | 4               | 0.70 ± 0.18   | 0.63 ± 0.19  | 0.317    |
| SpO <sub>2</sub> , %               | 9               | 92.4 ± 4.4    | 94.2 ± 3.6   | 0.168    |
| Flow titration                     | 5               | 92.6 ± 5.2    | 95.8 ± 2.4   | 0.104    |
| Constant flow                      | 4               | 92.3 ± 4.0    | 92.3 ± 4.3   | 1.0      |

**Supplemental Table 3.5** Comparison of demographic information and outcome between male and female patients.

|                                    | Male          | Female        | <i>p</i> |
|------------------------------------|---------------|---------------|----------|
| No. of patients                    | 22            | 29            |          |
| Age, years                         | 67.4 ± 14.3   | 57.7 ± 17.3   | 0.039    |
| Race                               |               |               | 0.182    |
| African American (%)               | 8 (36.4%)     | 18 (62.1%)    |          |
| Caucasian                          | 10 (45.5%)    | 8 (27.6%)     |          |
| SICU (%)                           | 13 (59.1%)    | 10 (34.5%)    | 0.054    |
| MICU (%)                           | 7 (31.8%)     | 8 (27.6%)     |          |
| Diagnosis (%)                      |               |               | 0.065    |
| PH                                 | 10 (45.5%)    | 6 (20.7%)     |          |
| PH + Hypoxemia                     | 5 (22.7%)     | 9 (31%)       |          |
| PH + RVD                           | 0 (13.7%)     | 7 (24.1%)     |          |
| RVD                                | 3 (13.6%)     | 1 (3.4%)      |          |
| RVD + Hypoxemia                    | 1 (4.5%)      | 3 (10.3%)     |          |
| PH + RVD + Hypoxemia               | 3 (13.6%)     | 3 (10.3%)     |          |
| iEPO indication (%)                |               |               |          |
| PH                                 | 18 (81.8%)    | 25 (86.2%)    | 0.713    |
| RVD                                | 7 (31.8%)     | 14 (48.3%)    | 0.266    |
| Hypoxemia                          | 9 (40.9%)     | 15 (51.7%)    | 0.573    |
| ECMO while iEPO was initiated (%)  | 2 (9.1%)      | 2 (6.9%)      | 1.0      |
| Chronic pulmonary disease (%)      | 8 (36.4%)     | 14 (48.3%)    | 0.569    |
| Home oxygen use (%)                | 6 (27.3%)     | 16 (55.2%)    | 0.046    |
| Code status of do-not-intubate (%) | 2 (9.1%)      | 5 (17.2%)     | 0.684    |
| Intubation                         | 4 (18.2%)     | 4 (13.8%)     | 0.713    |
| ICU mortality                      | 4 (18.2%)     | 7 (24.1%)     | 0.737    |
| Hospital mortality                 | 6 (27.3%)     | 8 (27.6%)     | 1.0      |
| Responder (39)                     | 14/19 (73.7%) | 13/20 (65.0%) | 0.731    |

iEPO, inhaled epoprostenol; HFNC, high-flow nasal cannula; MICU, medical intensive care unit; SICU, surgical intensive care unit; PH, pulmonary hypertension; RVD, right ventricular dysfunction; ECMO, extracorporeal membrane oxygenation.

**Supplement table 4.1** Response to iEPO via HFNC between patients with and without type I pulmonary hypertension.

|                                                                                                                    | <b>Type I PH</b> | <b>Other types of PH</b> | <b><i>p</i></b> |
|--------------------------------------------------------------------------------------------------------------------|------------------|--------------------------|-----------------|
| mPAP reduction (%) <sup>a</sup>                                                                                    | 19.6 (6.4, 27.6) | 16.2 (11.7, 22.1)        | 0.399           |
| Responders with mPAP reduction > 10%                                                                               | 80% (4/5)        | 11/12 (91.7%)            | 0.515           |
| Responders with mPAP reduction > 20%                                                                               | 40% (2/5)        | 33.3% (4/12)             | 1.0             |
| SpO <sub>2</sub> /FiO <sub>2</sub> improvement for patients with concomitant refractory hypoxemia (%) <sup>b</sup> | 17.8 (4.1, 51.2) | 16.3 (0.5, 37.3)         | 0.564           |
| Responders of hypoxemic patients using criteria of SpO <sub>2</sub> /FiO <sub>2</sub> improvement > 20%            | 50% (7/14)       | 50% (3/6)                | 1.0             |

iEPO, inhaled epoprostenol; SpO<sub>2</sub>, pulse saturation of oxygenation; FiO<sub>2</sub>, fraction of inhaled oxygen; mPAP, mean pulmonary arterial pressure; PH, pulmonary hypertension. <sup>a</sup>Data was available in 5 and 12 patients with PH type I and other types, respectively. <sup>b</sup>Data was available in 14 and 6 patients with PH type I and other types, respectively.

**Supplement table 4.2** Comparison of oxygenation response to iEPO via HFNC using flow titration versus constant flow in patients with type I pulmonary hypertension.

|                                                                                                                    | <b>Flow titration</b> | <b>Constant flow</b> | <b><i>p</i></b> |
|--------------------------------------------------------------------------------------------------------------------|-----------------------|----------------------|-----------------|
| SpO <sub>2</sub> /FiO <sub>2</sub> improvement for patients with concomitant refractory hypoxemia (%) <sup>a</sup> | 35.6(9.9, 161.4)      | 13.1 (0, 43.0)       | 0.257           |
| Responders of hypoxemic patients using criteria of SpO <sub>2</sub> /FiO <sub>2</sub> improvement > 20%            | 60% (3/5)             | 44.4% (4/9)          | 1.0             |

iEPO, inhaled epoprostenol; SpO<sub>2</sub>, pulse saturation of oxygenation; FiO<sub>2</sub>, fraction of inhaled oxygen; mPAP, mean pulmonary arterial pressure; PH, pulmonary hypertension. <sup>a</sup>Data was available in 5 and 9 patients with flow titration and constant flow, respectively.
